# Supplementary material for: Reduced inflammatory and muscle damage biomarkers following oral supplementation with bioavailable curcumin
Source: PubMed Central journal article supplement (PMC4802396; doi:10.1016/j.bbacli.2016.02.003), 2016-02-18
Supplement: mmc1.pdf [file mmc1.pdf]

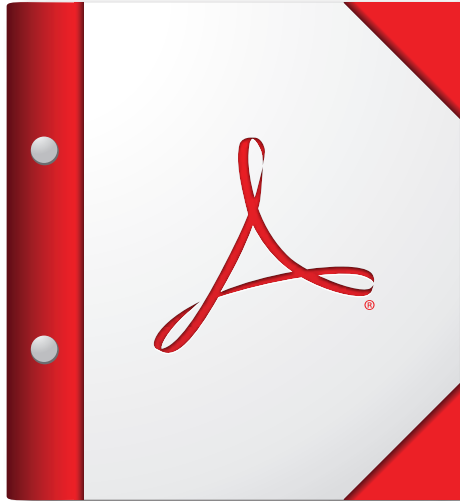

**For the best experience, open this PDF portfolio in  
Acrobat 9 or Adobe Reader 9, or later.**

[Get Adobe Reader Now!](#)
